# Supplementary material for: Comparison of π-hole tetrel bonding with σ-hole halogen bonds in complexes of XCN (X = F, Cl, Br, I) and NH3
Source: Royal Society of Chemistry journal article supplement (doi:10.1039/c5cp07545a), 2016-01-01
Supplement: c5cp07545a1.pdf [file c5cp07545a1.pdf]

### Supplementary Information

#### Comparison of $\pi$ -Hole Tetrel Bonding with $\sigma$ -Hole Halogen Bonds

in Complexes of XCN (X = F, Cl, Br, I) and NH<sub>3</sub>

Vincent de Paul N. Nziko and Steve Scheiner

#### Cartesian Coordinates of Optimized Heterodimers

##### $\pi$ -hole XCN $\cdots$ NH<sub>3</sub>

F

|   |              |              |              |
|---|--------------|--------------|--------------|
| 6 | 0.000000000  | 0.937176225  | 0.000000000  |
| 7 | -1.159571464 | 1.191976167  | 0.000000000  |
| 9 | 1.263709330  | 0.727888179  | 0.000000000  |
| 7 | -0.250224146 | -1.961764606 | 0.000000000  |
| 1 | -0.140555849 | -2.565736388 | 0.815386062  |
| 1 | -0.140555849 | -2.565736388 | -0.815386062 |
| 1 | -1.223707227 | -1.654060161 | 0.000000000  |

Cl

|    |              |              |              |
|----|--------------|--------------|--------------|
| 6  | 0.000000000  | 0.912699058  | 0.000000000  |
| 7  | -1.038174931 | 1.495525399  | 0.000000000  |
| 17 | 1.446246294  | 0.126086014  | 0.000000000  |
| 7  | -1.615202018 | -1.794317418 | 0.000000000  |
| 1  | -1.946996178 | -2.311144238 | 0.815265877  |
| 1  | -1.946996178 | -2.311144238 | -0.815265877 |
| 1  | -2.118546460 | -0.905827162 | 0.000000000  |

Br

|    |              |              |              |
|----|--------------|--------------|--------------|
| 6  | 0.000000000  | -1.055925125 | 0.000000000  |
| 7  | 0.624853072  | -2.070556430 | 0.000000000  |
| 35 | -0.950619903 | 0.465064285  | 0.000000000  |
| 7  | 2.784341449  | 0.507631836  | 0.000000000  |
| 1  | 3.346701329  | 0.754999993  | 0.815228306  |
| 1  | 3.346701329  | 0.754999993  | -0.815228306 |
| 1  | 2.713943407  | -0.511213837 | 0.000000000  |

I

|    |              |              |              |
|----|--------------|--------------|--------------|
| 6  | 0.949907072  | -0.896359068 | 0.000000000  |
| 7  | 1.528173115  | -1.939837147 | 0.000000000  |
| 53 | 0.000000000  | 0.867594065  | 0.000000000  |
| 7  | -1.654707125 | -2.584828195 | 0.000000000  |
| 1  | -1.134707086 | -2.923324221 | 0.810927062  |
| 1  | -1.134707086 | -2.923324221 | -0.810927062 |
| 1  | -2.544288192 | -3.085036233 | 0.000000000  |

$\sigma$ -hole NCX $\cdot\cdot$ NH<sub>3</sub>

F

|   |              |              |              |
|---|--------------|--------------|--------------|
| 6 | -0.000285000 | -0.009247001 | -1.519953115 |
| 7 | 0.000762000  | -0.016056001 | -2.707448205 |
| 9 | -0.001280000 | -0.001840000 | -0.237864018 |
| 7 | -0.000278000 | 0.017614001  | 2.903076220  |
| 1 | -0.392147030 | 0.874534066  | 3.294621249  |
| 1 | 0.940687071  | -0.064287005 | 3.289144249  |
| 1 | -0.538688041 | -0.749111057 | 3.307339250  |

Cl

|    |              |              |              |
|----|--------------|--------------|--------------|
| 6  | -1.675669127 | 0.000017000  | -0.000069000 |
| 7  | -2.866491217 | -0.000082000 | -0.000100000 |
| 17 | -0.020846002 | 0.000107000  | 0.000067000  |
| 7  | 2.929450222  | 0.000182000  | 0.000237000  |
| 1  | 3.324668251  | 0.925504070  | -0.170528013 |
| 1  | 3.319470251  | -0.611255046 | -0.717830054 |
| 1  | 3.323545251  | -0.316864024 | 0.886669067  |

Br

|    |              |              |              |
|----|--------------|--------------|--------------|
| 6  | -1.777501134 | -0.000110000 | 0.000031000  |
| 7  | -2.969213225 | -0.001031000 | 0.000455000  |
| 35 | 0.032862002  | 0.000460000  | -0.000207000 |
| 7  | 2.912524220  | -0.000607000 | 0.000185000  |
| 1  | 3.304298250  | -0.522670039 | -0.784460059 |

|    |              |              |              |
|----|--------------|--------------|--------------|
| 1  | 3.301705250  | -0.420791032 | 0.844988064  |
| 1  | 3.305663250  | 0.939484071  | -0.057949005 |
| I  |              |              |              |
| 6  | 1.968385149  | -0.000355000 | 0.000232000  |
| 7  | 3.161306239  | -0.000989000 | 0.000682000  |
| 53 | -0.067534005 | 0.000349000  | -0.00030100  |
| 7  | -2.919755221 | -0.000782000 | 0.000931000  |
| 1  | -3.306380250 | -0.452970034 | 0.830457063  |
| 1  | -3.306976250 | -0.493777037 | -0.804722061 |
| 1  | -3.308504250 | 0.942800071  | -0.022449002 |
